# Supplementary material for: A long-term field experiment demonstrates the influence of tillage on the bacterial potential to produce soil structure-stabilizing agents such as exopolysaccharides and lipopolysaccharides
Source: PubMed Central journal article supplement (PMC7989815; doi:10.1186/s40793-019-0341-7), 2019-03-28
Supplement: 40793_2019_341_MOESM4_ESM.pdf [file 40793_2019_341_MOESM4_ESM.pdf]

**A**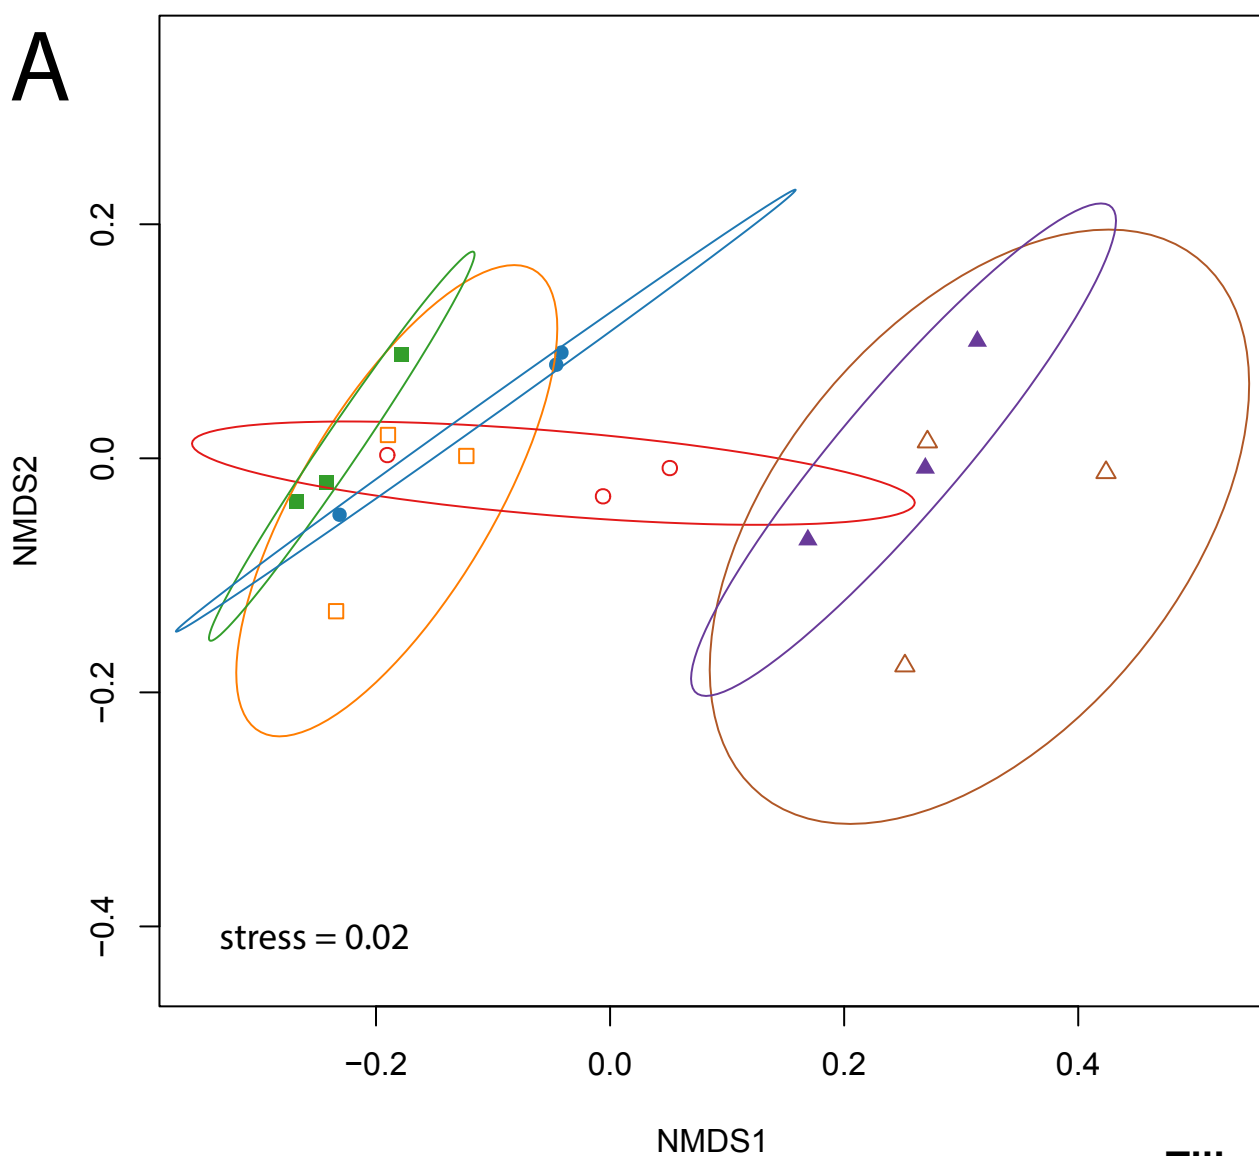**B**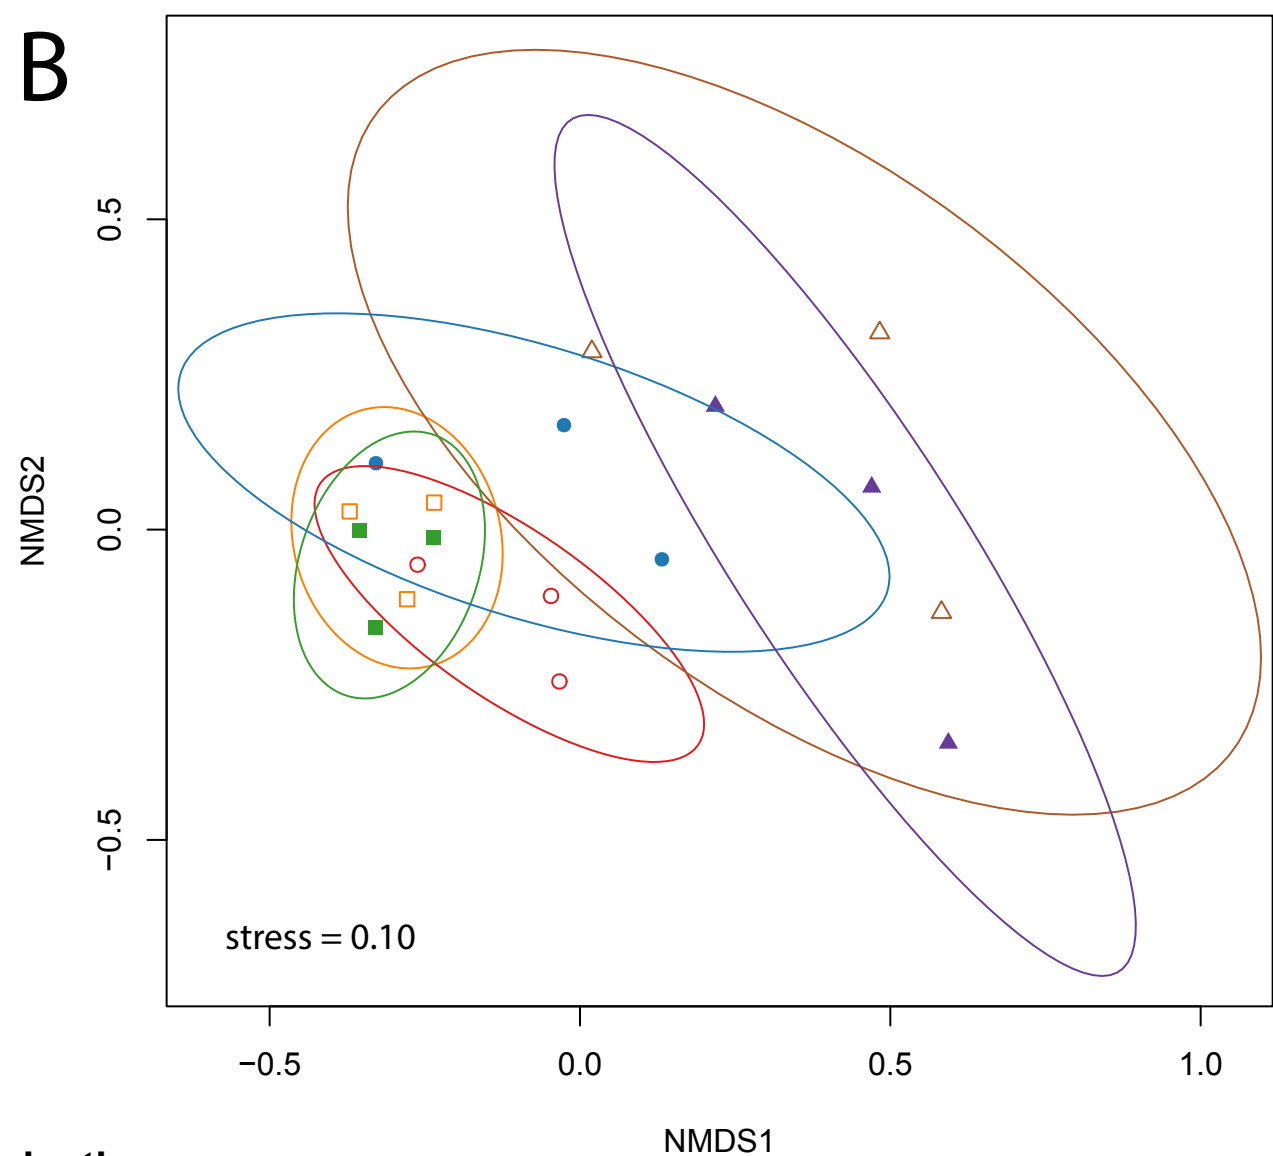**Tillage, depth**

- |                          |                     |
|--------------------------|---------------------|
| □ conventional, 0–10 cm  | ■ reduced, 0–10 cm  |
| ○ conventional, 10–20 cm | ● reduced, 10–20 cm |
| △ conventional, 20–50 cm | ▲ reduced, 20–50 cm |
