# Supplementary material for: A long-term field experiment demonstrates the influence of tillage on the bacterial potential to produce soil structure-stabilizing agents such as exopolysaccharides and lipopolysaccharides
Source: PubMed Central journal article supplement (PMC7989815; doi:10.1186/s40793-019-0341-7), 2019-03-28

Shannon-Weiner index

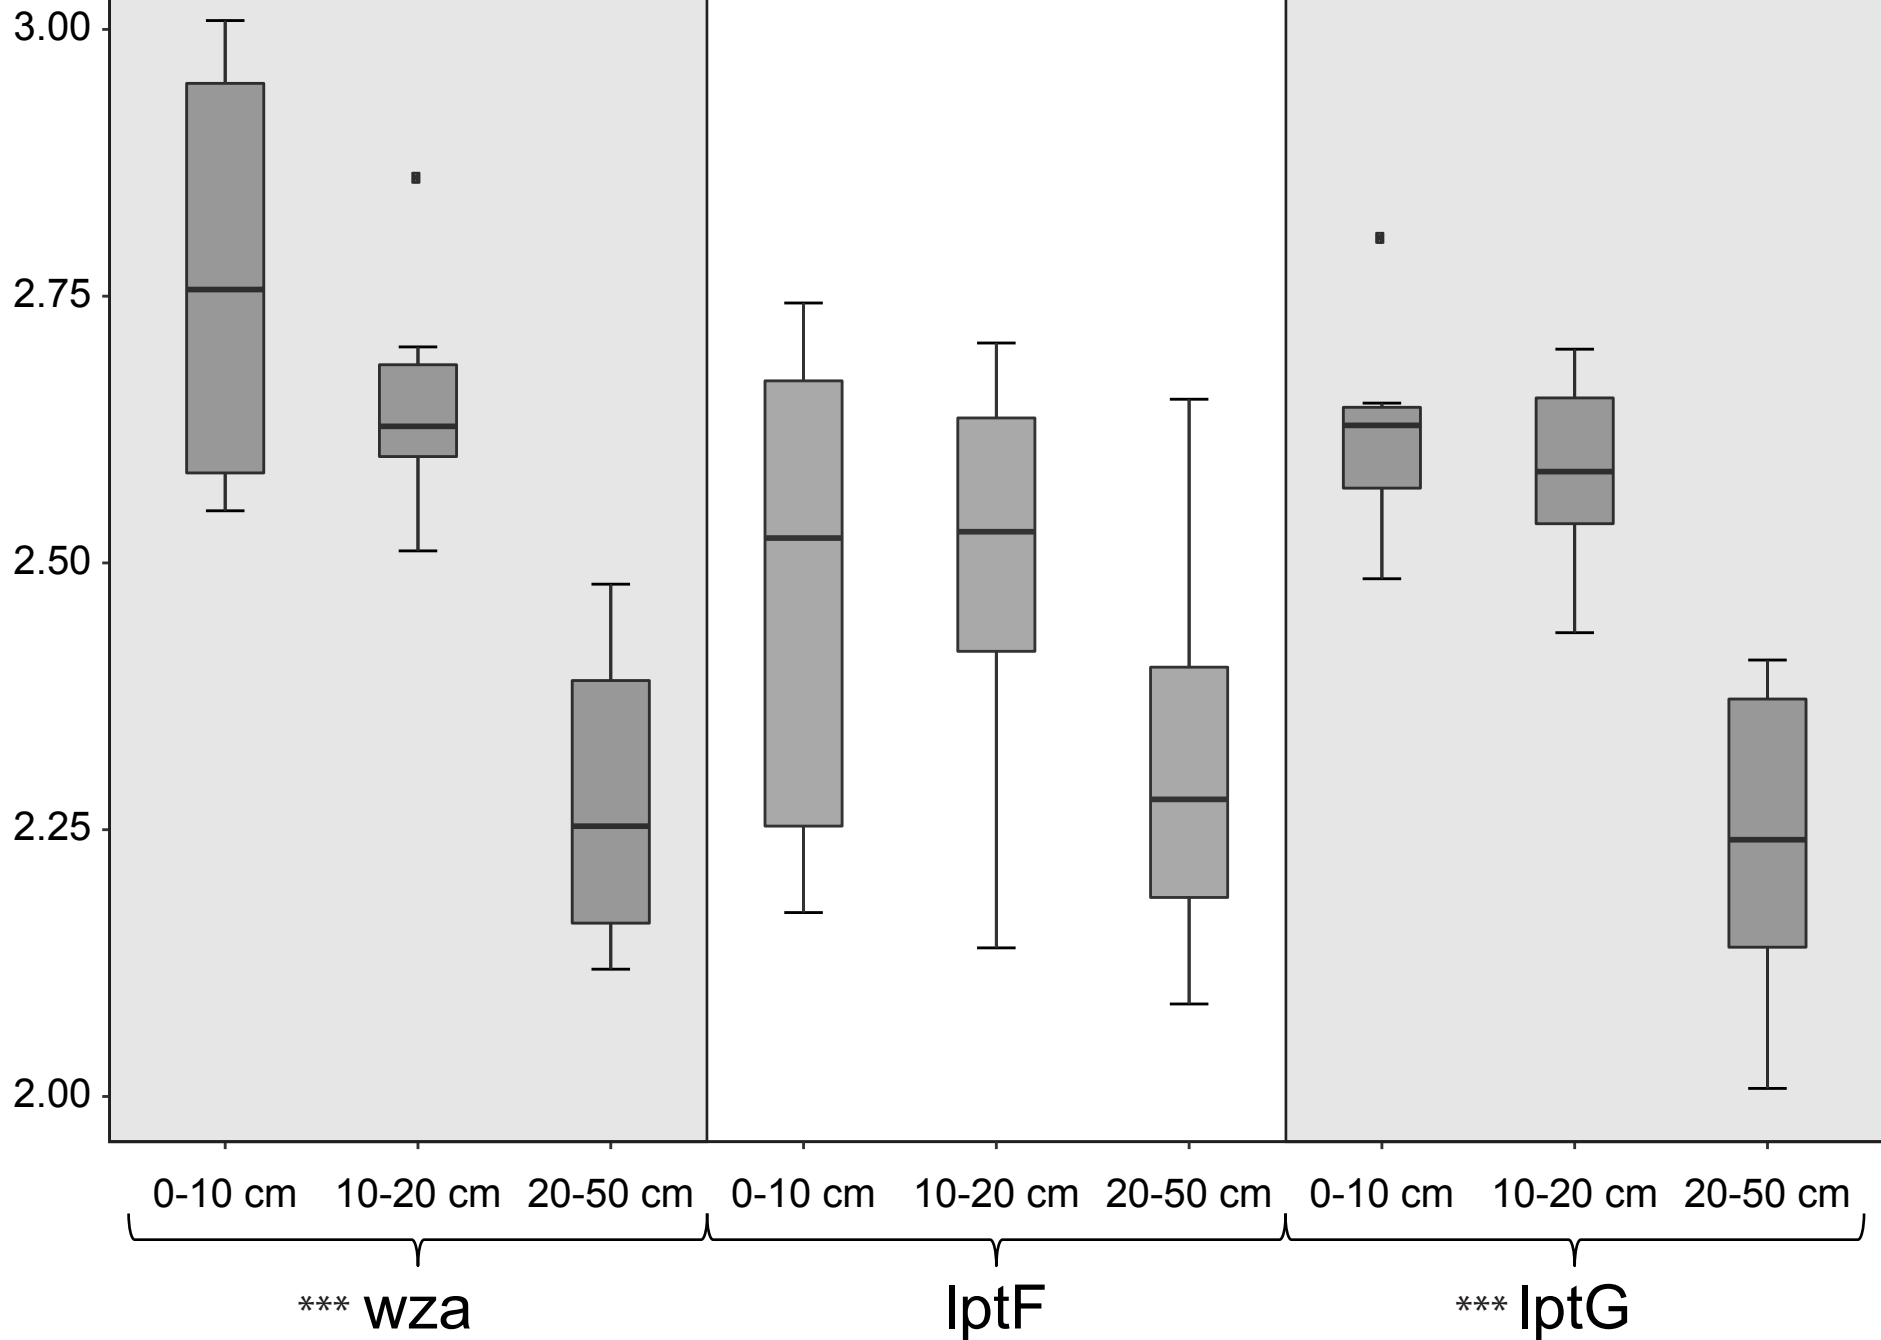

Supplement: 40793_2019_341_MOESM8_ESM.pdf [file 40793_2019_341_MOESM8_ESM.pdf]
